# Supplementary material for: Is there Universality in the Dielectric Response of Polar Glass Formers?
Source: Research Square preprint supplement (doi:10.21203/rs.3.rs-493275/v1), 2021-05-11
Supplement: Supplementary file 1 [file 4a82a241b3821cea9b5c6dca.docx]

**Is there universality in the dielectric response of polar glass formers?**

K.L. Ngai1, Z. Wojnarowska2, M. Paluch2

*1Dipartimento di Fisica, CNR-IPCF, Università di Pisa, Largo Bruno Pontecorvo 3, I-56127, Pisa, Italy*

*2Institute of Physics, University of Silesia in Katowice, 75 Pułku Piechoty 1A, 41–500 Chorzów, Poland*


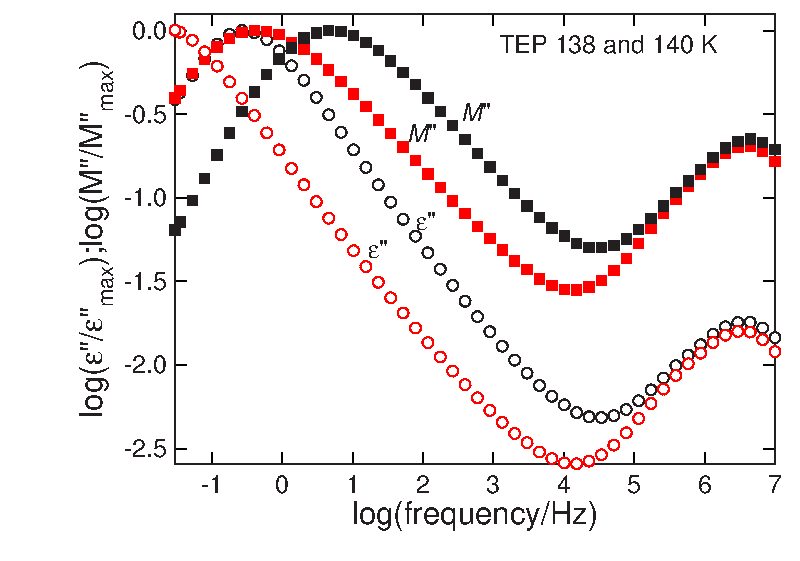


**Figure S1** The rescaled dielectric data of TEP recorded at 138 and 140 K. The data are taken from ref. R. Kahlau, T. Dorfler, and E. A. Rossler, *Secondary relaxations in a series of organic phosphate glasses revealed by dielectric spectroscopy*, J. Chem. Phys. **139**, 134504 (2013).


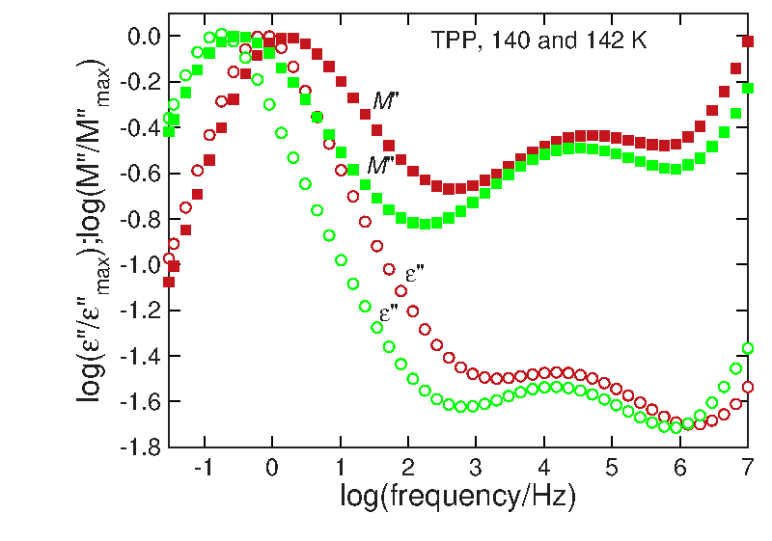


**Figure S2** The rescaled dielectric data of TPP recorded at 140 and 142 K. The data are taken from ref. R. Kahlau, T. Dorfler, and E. A. Rossler, *Secondary relaxations in a series of organic phosphate glasses revealed by dielectric spectroscopy*, J. Chem. Phys. **139**, 134504 (2013).
